# Supplementary material
Source: PubMed Central journal article supplement (PMC5654545)
Supplement: NIHMS910608-supplement-supplement.pdf [file NIHMS910608-supplement-supplement.pdf]

# Stroke

JOURNAL OF THE AMERICAN HEART ASSOCIATION

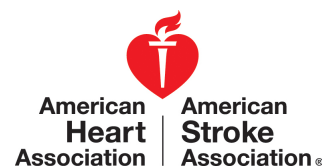

## Defining Optimal Brain Health in Adults: A Presidential Advisory From the American Heart Association/American Stroke Association

Philip B. Gorelick, Karen L. Furie, Costantino Iadecola, Eric E. Smith, Salina P. Waddy, Donald M. Lloyd-Jones, Hee-Joon Bae, Mary Ann Bauman, Martin Dichgans, Pamela W. Duncan, Meighan Girgus, Virginia J. Howard, Ronald M. Lazar, Sudha Seshadri, Fernando D. Testai, Stephen van Gaal, Kristine Yaffe, Hank Wasiak and Charlotte Zerna

*Stroke*. published online September 7, 2017;

*Stroke* is published by the American Heart Association, 7272 Greenville Avenue, Dallas, TX 75231

Copyright © 2017 American Heart Association, Inc. All rights reserved.

Print ISSN: 0039-2499. Online ISSN: 1524-4628

The online version of this article, along with updated information and services, is located on the World Wide Web at:

<http://stroke.ahajournals.org/content/early/2017/09/07/STR.000000000000148>

Data Supplement (unedited) at:

<http://stroke.ahajournals.org/content/suppl/2017/09/07/STR.000000000000148.DC1>

**Permissions:** Requests for permissions to reproduce figures, tables, or portions of articles originally published in *Stroke* can be obtained via RightsLink, a service of the Copyright Clearance Center, not the Editorial Office. Once the online version of the published article for which permission is being requested is located, click Request Permissions in the middle column of the Web page under Services. Further information about this process is available in the [Permissions and Rights Question and Answer](#) document.

**Reprints:** Information about reprints can be found online at:  
<http://www.lww.com/reprints>

**Subscriptions:** Information about subscribing to *Stroke* is online at:  
<http://stroke.ahajournals.org/subscriptions/>

## Systematic Review: Supplement to Defining Brain Health

**Objective:** To systematically search the literature to identify potentially modifiable risk factors for age-related cognitive decline and incident cognitive impairment in the general population. The results of the searches are intended to aid the writing committee for “Defining Optimal Brain Health”, by complementing the targeted searches and expert knowledge of the committee members.

**Background:** We used the outline of “Defining Optimal Brain Health” (March 28, 2017 version) as the source document to plan the search methods. Because cognitive ability is (arguably) the most important function of a healthy brain, we devised search methods to identify risk factors for cognitive impairment or decline. To provide reasonable limits on the scope of the searches, we considered but ultimately rejected searches for other brain health outcomes such as cognitive-related activities of daily living, patient/participant reported outcomes of cognitive-related quality of life, and mental health outcomes such as mood disorders.

### Methods:

**Overview:** For this review, we operationalized the concept of “brain health” as preserving cognitive function and the absence of cognitive disorders (all-cause mild cognitive impairment or synonyms, or dementia). To improve the quality of returned articles, we only included longitudinal studies reporting incident or progressive cognitive impairment, excluding cross-sectional studies. Longitudinal studies are expected to be less vulnerable to the possibility of reverse causality.

We sought information on a broad range of exposures, including the risk factors related to the American Heart Associations “Life’s Simple 7”<sup>1</sup> as well as potentially modifiable exposures (defined below in Selection Criteria).

**Selection Criteria:** We included cohort studies that examined the relationships between potentially modifiable risk factors and either incident cognitive disorders (such as dementia or mild cognitive impairment) or longitudinal measures of cognitive decline (Table 1, Selection Criteria). We excluded exposures that we deemed non-modifiable, biologically implausible, intermediate physiological markers of other processes, highly vulnerable confounding, or for which there was randomized controlled trial (RCT) evidence that the modifying the exposure was either ineffective or produced harm (Table 2). We included prior systematic reviews.

---

<sup>1</sup> [http://www.heart.org/HEARTORG/Conditions/My-Life-Check---Lifes-Simple-7\\_UCM\\_471453\\_Article.jsp#.WVJHN4jyvic](http://www.heart.org/HEARTORG/Conditions/My-Life-Check---Lifes-Simple-7_UCM_471453_Article.jsp#.WVJHN4jyvic)

**Table 1. Selection Criteria**

---

|                    |                                                                                                                                                                                                                                                                                                                                                                                                                                                                                                                                                                                                                                                                                                                                                                                                                                                                                       |
|--------------------|---------------------------------------------------------------------------------------------------------------------------------------------------------------------------------------------------------------------------------------------------------------------------------------------------------------------------------------------------------------------------------------------------------------------------------------------------------------------------------------------------------------------------------------------------------------------------------------------------------------------------------------------------------------------------------------------------------------------------------------------------------------------------------------------------------------------------------------------------------------------------------------|
| Inclusion criteria | <ul style="list-style-type: none"><li>• Describes relationship between a potentially modifiable exposure and an outcome as defined below.<ul style="list-style-type: none"><li>• Exposure: Potentially modifiable exposure, as defined in Table 2.</li><li>• Outcome: Change over time on neuropsychological testing or cognitive screening test (<i>e.g.</i> Folstein MiniMental State Exam), or incident dementia or mild cognitive impairment (including similar constructs as defined by the study authors, including cognitively impaired not dementia).</li></ul></li><li>• Design: Either cohort study or systematic review of other relevant studies. Exposure must have been measured prior to the outcome, with longitudinal follow-up of at least one year.</li><li>• Population-based or community-based sampling.</li><li>• Published in the English language.</li></ul> |
| Exclusion criteria | <ul style="list-style-type: none"><li>• Study sample is not a population-based or community-based study, <i>e.g.</i> sampling from a hospital or a clinic.</li><li>• Disease-based study sample with neurological or psychiatric disorder.</li><li>• Cross-sectional study design.</li><li>• Fewer than 100 participants.</li><li>• Outcomes in pediatric populations (&lt;18). (Note: pediatric/in utero exposures allowed, if cognition/cognitive disorders or decline were assessed in adult life).</li><li>• Study not in human subjects.</li><li>• Non-English language.</li><li>• Publication date prior to January 1, 1980.</li></ul>                                                                                                                                                                                                                                          |

---

**Table 1. Classification of Included vs. Excluded Exposure Categories**

| Relevant and Included                      | Considered Not Relevant, and Not Included                        |                                                                                                      |                                |                                                                    |
|--------------------------------------------|------------------------------------------------------------------|------------------------------------------------------------------------------------------------------|--------------------------------|--------------------------------------------------------------------|
|                                            | Potentially modifiable                                           | Not modifiable or not easily modifiable                                                              | Likely confounded or biased    | Intermediate physiological markers unlikely to be causally related |
| Cholesterol                                | Age                                                              | Specific antihypertensive choices (e.g. angiotensin receptor blocker, calcium channel blockers)      | Carotid intima-media thickness | Estrogen                                                           |
| Hypertension/blood pressure                | Sex                                                              | Other prescription medications proposed to have off-target benefits or harms: proton pump inhibitors | Subclinical atherosclerosis    | Hormone replacement therapy                                        |
| History of stroke                          | Markers of inflammation (e.g. C-reactive protein, interleukin-6) |                                                                                                      | Heart rate                     |                                                                    |
| Diabetes                                   | Apolipoprotein E genotype                                        |                                                                                                      | Frailty                        |                                                                    |
| Kidney disease                             | Other genetic polymorphisms                                      |                                                                                                      | Walking speed                  |                                                                    |
| Chronic obstructive pulmonary disease      | Heart rate variability                                           |                                                                                                      | Anemia                         |                                                                    |
| Heart failure                              | Pulse pressure                                                   |                                                                                                      | Red cell membrane fluidity     |                                                                    |
| Coronary artery disease                    | Evidence of past infectious burden (e.g. herpes simplex virus)   |                                                                                                      | Bone mineral density           |                                                                    |
| Tooth loss, periodontitis                  |                                                                  |                                                                                                      |                                |                                                                    |
| Sleep-disordered breathing, sleep duration |                                                                  |                                                                                                      |                                |                                                                    |
| Hearing loss                               |                                                                  |                                                                                                      |                                |                                                                    |
| Vision loss                                |                                                                  |                                                                                                      |                                |                                                                    |
| Physical activity                          |                                                                  |                                                                                                      |                                |                                                                    |
| Exercise                                   |                                                                  |                                                                                                      |                                |                                                                    |
| Depression                                 |                                                                  |                                                                                                      |                                |                                                                    |
| Anxiety                                    |                                                                  |                                                                                                      |                                |                                                                    |
| Smoking                                    |                                                                  |                                                                                                      |                                |                                                                    |
| Alcohol use                                |                                                                  |                                                                                                      |                                |                                                                    |
| Recreational drug use                      |                                                                  |                                                                                                      |                                |                                                                    |
| Education                                  |                                                                  |                                                                                                      |                                |                                                                    |
| Social participation                       |                                                                  |                                                                                                      |                                |                                                                    |

|                                             |  |
|---------------------------------------------|--|
| Cognitive activities                        |  |
| Personality traits                          |  |
| Built environment                           |  |
| Occupation                                  |  |
| Dietary choices                             |  |
| Mediterranean diet                          |  |
| Caffeine                                    |  |
| Vitamin intake                              |  |
| Vitamin and mineral levels                  |  |
| Omega-3 fatty acids, micronutrients         |  |
| Homocysteine                                |  |
| Thyroid hormone levels                      |  |
| Insulin levels or resistance                |  |
| Body mass index, weight, waist-to-hip ratio |  |
| Lead, aluminum                              |  |
| Pesticides                                  |  |
| Air pollution                               |  |
| Electromagnetic radiation                   |  |
| Benzodiazepine use                          |  |
| Anticholinergic drug use                    |  |

## Search

Potentially relevant studies were identified using a Medline search conducted in the Ovid environment on April 1, 2017 (search strategy included as Appendix 1). The search strategy was intended to sensitively capture studies of the epidemiology of specific neurodegenerative disorders as well as of unspecified cognitive impairment using a broad array of inclusionary MeSH headings. Exclusionary MeSH headings were specified for specific disorders unrelated to neurodegenerative diseases (e.g. demyelinating diseases) and for reliably coded study characteristics (e.g. animal subjects).

## Review

Search results were transferred to Covidence (Veritas Health Innovation Ltd, Melbourne, Australia) for team review. Each study title and abstract was screened for relevance by one of three authors (CZ, SVG, ES).

Potentially relevant studies were moved forward to a second review stage where they were subsequently assessed by a second reviewer, and a final determination of eligibility was made. Discrepancies on eligibility were resolved by consensus.

A single reviewer sorted studies according to whether they assessed any of Life's Simple 7 as an exposure, assessed other exposures, or were systematic reviews. For an article to be considered relevant for a specific exposure category, the abstract must have noted that the exposure was studied as an independent variable of interest. Exposures described as covariates only were not included.

## Results

The literature search identified 33,925 articles. After initial review by a single reviewer, intended to value sensitivity (i.e. inclusion of as many potentially relevant articles as possible), 2,009 articles remained. After 2<sup>nd</sup> review and consensus, 1,121 articles were deemed relevant (Figure). The 1,121 eligible studies, sorted by exposure category, were provided to Writing Committee members.

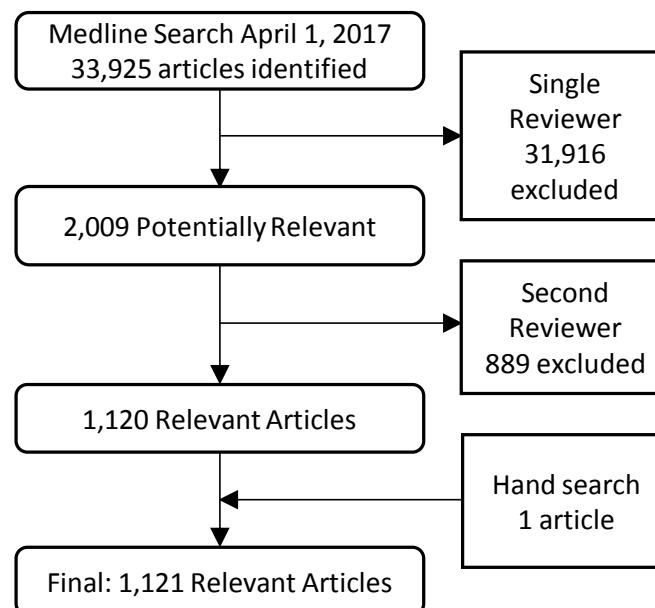

## Appendix 1. Search strategy

1. exp Alzheimer Disease/
2. exp Dementia, Vascular/
3. Dementia/
4. exp Lewy Body Disease/
5. mild cognitive.mp. [mp=title, abstract, original title, name of substance word, subject heading word, keyword heading word, protocol supplementary concept word, rare disease supplementary concept word, unique identifier, synonyms]
6. MCI.mp. [mp=title, abstract, original title, name of substance word, subject heading word, keyword heading word, protocol supplementary concept word, rare disease supplementary concept word, unique identifier, synonyms]
7. exp Risk Factors/
8. exp Epidemiology/
9. exp Cohort Studies/
10. 1 or 2 or 3 or 4 or 6
11. 7 or 8 or 9
12. 10 and 11
13. exp Cognitive Dysfunction/
14. Cognition Disorders/
15. exp Neuropsychological Tests/
16. exp Executive Function/
17. memory disorders/ or amnesia/
18. 13 or 14 or 15 or 16 or 17
19. 18 and 11
20. exp Alzheimer Disease/dh, ep, et, pc [Diet Therapy, Epidemiology, Etiology, Prevention & Control]
21. exp Lewy Body Disease/ep, et, pc [Epidemiology, Etiology, Prevention & Control]
22. exp Dementia, Vascular/dh, ep, et, pc [Diet Therapy, Epidemiology, Etiology, Prevention & Control]
23. Dementia/dh, ep, et, pc [Diet Therapy, Epidemiology, Etiology, Prevention & Control]
24. Cognition Disorders/dh, ep, et, pc [Diet Therapy, Epidemiology, Etiology, Prevention & Control]
25. Cognitive Dysfunction/dh, ep, et, pc [Diet Therapy, Epidemiology, Etiology, Prevention & Control]
26. Memory Disorders/dh, ep, et, pc [Diet Therapy, Epidemiology, Etiology, Prevention & Control]
27. Amnesia/dh, ep, et, pc [Diet Therapy, Epidemiology, Etiology, Prevention & Control]
28. 24 or 25 or 26 or 27
29. exp Pathology/
30. Animals/
31. exp Adult/
32. 29 or 30
33. 20 or 21 or 22 or 23
34. 12 or 33

35. 34 and 32
36. 34 not 35
37. 36 and 31
38. 19 or 28
39. 38 and 32
40. 38 not 39
41. 40 or 37
42. exp Child/
43. mental disorders/ or exp "bipolar and related disorders"/ or exp "disruptive, impulse control, and conduct disorders"/ or exp dissociative disorders/ or exp elimination disorders/ or exp "feeding and eating disorders"/ or exp neurodevelopmental disorders/ or exp neurotic disorders/ or exp paraphilic disorders/ or exp personality disorders/ or exp "schizophrenia spectrum and other psychotic disorders"/ or exp sexual dysfunctions, psychological/ or exp somatoform disorders/ or exp "trauma and stressor related disorders"/
44. exp "autoimmune diseases of the nervous system"/ or exp autonomic nervous system diseases/ or exp chronobiology disorders/ or exp cranial nerve diseases/ or exp demyelinating diseases/ or exp nervous system malformations/ or exp nervous system neoplasms/ or exp neurocutaneous syndromes/ or exp neuromuscular diseases/ or exp neurotoxicity syndromes/ or exp restless legs syndrome/ or exp trauma, nervous system/
45. 42 or 43 or 44
46. 41 and 45
47. 41 not 46
48. limit 47 to (abstracts and english language)
